# Supplementary material for: Decreased RNA polymerase III subunit expression leads to defects in oligodendrocyte development
Source: Front Neurosci. 2023 Apr 25;17:1167047. doi: 10.3389/fnins.2023.1167047 (PMC10167296; doi:10.3389/fnins.2023.1167047)
Supplement: Supplementary file 1 [file Data_Sheet_1.docx]

**Decreased RNA polymerase III subunit expression leads to defects in oligodendrocyte development**

**Supplemental Figures and Tables**

Julia Macintosh MSc1,2, Mackenzie Michell-Robinson MSc1,2, Xiaoru Chen PhD1,2, Geneviève Bernard MD, MSc, FRCPc1,2,3,4,5*

**Affiliations**

1Department of Neurology and Neurosurgery, McGill University, Montreal, Quebec, Canada

2Child Health and Human Development Program, Research Institute of the McGill University Health Center, Montreal, Quebec, Canada

3Department of Pediatrics, McGill University, Montreal, Quebec, Canada

4Department of Human Genetics, McGill University, Montreal, Quebec, Canada

5Department Specialized Medicine, Division of Medical Genetics, McGill University Health Center, Montreal, Quebec, Canada

**Correspondence**: Geneviève Bernard, MD, MSc, FRCPc, Research Institute of the McGill University Health Centre, 1001 boul. Décarie, Site Glen Pavilion E/Block E, Montreal, QC H4A 3J1, Canada; [genevieve.bernard@mcgill.ca](mailto:genevieve.bernard@mcgill.ca)

**Figure S1:** Representative immunofluorescence images (from three independent experiments with similar results) of siRNA-treated OPCs in proliferation media, showing PDGFRα (green), NG2 (red), and Ki67 (yellow). Nuclei stained with DAPI. Separate fluorescent channels shown. Scale bar, 50 µm (20X).

**
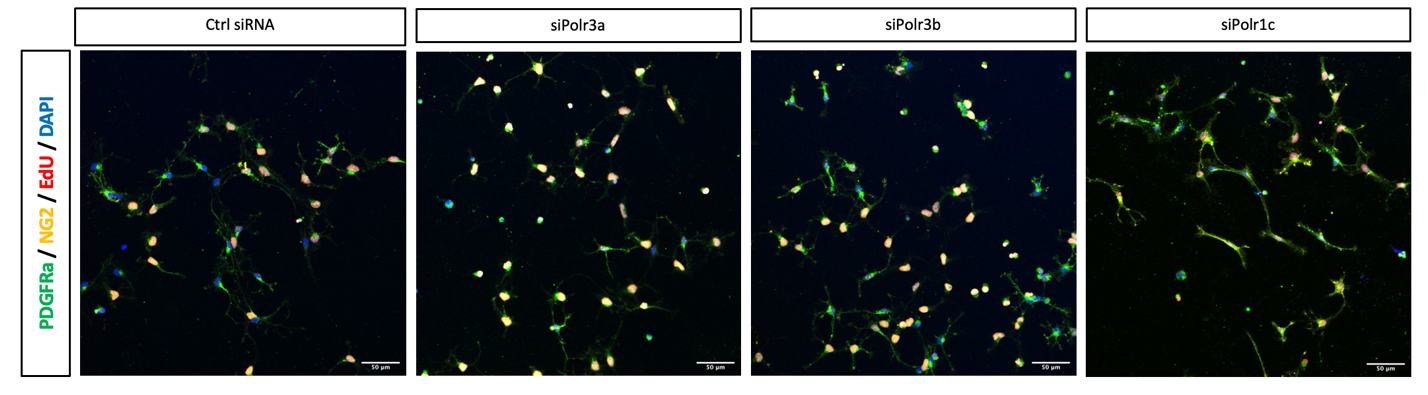
**

**Figure S2:** Representative images (from five independent experiments with similar results) of siRNA-treated OPCs in proliferation media labeled with EdU and showing PDGFRα (green) and NG2 (yellow). Nuclei stained with DAPI. Scale bar, 50 µm.

**Figure S3:** Representative images (from five independent experiments with similar results) of siRNA-treated OPCs labelled with EdU. Nuclei stained with DAPI. Separate fluorescent channels shown. Scale bar, 50 µm (20X).

**Table S1:** Antibody information

| Anti-Ki67 (1:200) | Novus | AF7649 |
| --- | --- | --- |
| Anti-PDGFRα (ICC 1:100, IP 1:250) | BD | 558774 |
| Anti-NG2 (1:200) | Millipore | AB5320 |
| Anti-MOG (1:300) | R&D | MAB2439 |
| Anti-MBP (1:100-1:500) | Novus | NB600-717 |
| Anti-Calbindin D28-k (1:5000) | Swant | CB38 |
| Anti-Cleaved caspase 3 (1:250) | CST | 9661 |
| Anti-O4 (1:200) | R&D | MAB1326 |
| AlexaFluor 488 donkey anti-rat (1:1000) | Fisher Scientific | A21208 |
| AlexaFluor 647 donkey anti-rabbit (1:300-1:500) | Jackson ImmunoResearch | 711-605-152 |
| AlexaFluor 594 donkey anti-sheep (1:500) | Abcam | 713-585-147 |
| AlexaFluor 555 donkey anti-goat (1:500) | Invitrogen | A-21432 |
| Goat anti-rat IgG (IP 1: 333) | Jackson ImmunoResearch | 115-005-167 |
| AlexaFluor 594 donkey anti-mouse (1:500) | Jackson Immunoresearch | 715-585-020 |

**Table S2:** RT-qPCR primers

| *Polr3a* | F: CATGTCGGGTACTTCAGGGCT |
| --- | --- |
| R: TAATGTGGCAGCAGGTTTTGCAG |
| *Polr3b* | F: TTGGAGCCTCAGTTACCAGC |
| R: GAATCGACCCTGTTTCACGG |
| *Polr1c* | F: GTCCACACCACGGACTTTC |
| R: CCACACGGAAATTCTTCTCGA |
| *Pdgfr*α | F: CATCTATGTACCAGACCCAGAC |
| R: AAGGTATGATGGCAGAGTCATCC |
| *Cspg4* | F: CCTTCCTACAAGTGACCATTGCC |
| R: TCCTGGACCACCTCTAGCT |
| *Fyn* | F: GAAGCCCGCTCCTTGACA |
| R: CCAAGTTTTCCAAAGTACCACTCTT |
| *Nfasc* | F: AATCCGAGTCCTGAACAGCA |
| R: TTCCCTCCAGTAGTAAGCTCGATA |
| *Kif19a* | F: GCTGAGTGACAAGGGCAGTAA |
| R: GTTCCCGCCTAGTGAATCCTTC |
| *Mbp* | F: TCAAGAACATTGTGACACCTCG |
| R: AGCTAAATCTGCTGAGGGAC |
| *Mog* | F: GCCTGTTTGTGGAGCTTCTCTTG |
| R: CCTATCACTCTGAATTGTCCTGCAT |
| *Cnp* | F: CTGAGACCCTCCGAAAAGCTG |
| R: TCCAGAAATAAAGTGTCGAAGCTCT |
| *5s* | F: GCCATACCACCCTGAACGC |
| R: TATTCCCAGGCGGTCTCCC |
| *7sl* | F: GGAGTTCTGGGCTGTAGTGC |
| R: TTTGACCTGCTCCGTTTCCG |
| *U6* | F: CGCTTCGGCAGCACATATAC |
| R: TTCACGAATTTGCGTGTCAT |
| tRNA-iMet-CAT-1-2 | F: GCAGCGGAAGCGTGCT |
| R: AGCAGAGGATGGTTTCGATCC |
| tRNA-Tyr-GTA-1-1 | F: CTCAGTTGGTAGAGCGGAGG |
| R: CCTTCGAGCCGGATTCG |
| tRNA-Lys-TTT-2-1 | F: CCTGGATAGCTCAGTCGGTAGAG |
| R: GACTTGAACCCTGGACCCTCA |
| *18s* | F: GTAACCCGTTGAACCCCATT |
| R: CCATCCAATCGGTAGTAGCG |
| *Gusb* | F: GTGGTATGAACGGGAAGCAAT |
| R: AACTGCATAATAATGGGCACTGT |
| *Pgk1* | F: TGGTGGGTGTGAATCTGCC |
| R: ACTTTAGCGCCTCCCAAGATA |

**Table S3:** Materials and Reagents

| **Reagent** | **Source** | **Identifier** |
| --- | --- | --- |
| Griffonia (Bandeiraea) simplicifolia lectin I GSL I, BSL I | Biolynx | VECTL1100 |
| Papain | Worthington | LS003126 |
| DNase I | Worthington | LS002007 |
| L-cysteine | Sigma | C7477 |
| Insulin from bovine pancreas | Sigma | I6634 |
| Ovomucoid | Worthington | LS003086 |
| Bovine Serum Albumin | Sigma | A3912 |
| Transferrin | Sigma | T1147 |
| Putrescine | Sigma | 221732 |
| Progesterone | Sigma | P8783 |
| Sodium selenite | Sigma | S5261 |
| Penicillin-Streptomycin | Wisent | 450-201-EL |
| Sodium pyruvate | Gibco | 11360070 |
| Glutamax | Gibco | 35050061 |
| N-acetyl-L-cysteine | Sigma | A7250 |
| Forskolin | Sigma | F3917 |
| D-Biotin | Sigma | B4639 |
| Trace Elements B | Fisher Scientific | MT99175Cl |
| B-27 without vitamin A | ThermoFisher | 12587010 |
| Recombinant human PDGF-AA | Preprotech | 100-13A |
| Recombinant human bFGF | Preprotech | 100-18B |
| Triiodothyronine | Sigma | T6397-100mg |
| D-PBS with Mg2+ Ca2+ | ThermoFisher | 14287080 |
| Earle’s Balanced Salt Solution | Wisent | 311210CL |
| Dubleco’s Modified Eagle’s Medium | Wisent | 319-005-CL |
| Minimum Essential Medium | Sigma | 51412C-1000ML |
| DMEM-F12 1% GlutaMAX | ThermoFisher | 10565018 |
| Fetal Bovine Serum | Wisent | 089-150 |
| Heat-Inactivated horse serum | ThermoFisher | 26050088 |
| Glucose | ThermoFisher | A2494001 |
| Fungizone | ThermoFisher | 15290018 |
| B-27 Supplement (50X), serum free | ThermoFisher | 17504044 |
| N-2 Supplement (100X) | ThermoFisher | 17502048 |
| Poly-d-Lysine hydrobromide | Sigma | P8099 |
| Trypsin/EDTA | Wisent | 325.043-cl |
| Corning™ Transwell™ Multiple Well Plate with Permeable Polycarbonate Membrane Inserts | Fisher | 07-200-150 |
| ReadyProbes™ Cell Viability Imaging Kit, Blue/Green | Invitrogen | R37609 |
| TRIzolTM reagent | ThermoFisher | 15596018 |
| miRNeasy Mini Kit | Qiagen | 217004 |
| RNAse free DNAse kit | Qiagen | 79254 |
| Oligo(d)T | ThermoFisher | 18418020 |
| Random Hexamers | IDT | 51-01-18-25 |
| RNasin® Ribonuclease Inhibitors | Promega | N2611 |
| MMLV RT | Promega | M1705 |
| MMLV 5x reaction buffer | Promega | M5313 |
| SsoAdvanced Universal SYBR® Green Supermix | Bio-Rad Laboratories | 1725274 |
| GoTaq® Master Mixes | Promega | M7122 |
| Extracta™ DNA Prep for PCR | QuantaBio | CA97065-350 |
| MilliporeSigma™ Millicell™ Culture Plate Inserts | Fisher | PICM03050 |
| Pre-Treated German Glass Coverslips 15mm #1 | Electron Microscopy Sciences | 72291-04 |
| Thermo Scientific™ Shandon™ Immu-Mount™ | Fisher Scientific | 9990402 |
| Click-iT™ EdU Cell Proliferation Kit for Imaging | ThermoFisher | C10340 |
| siGENOME mouse Polr3a siRNA - SMARTPool 5nmol | Dharmacon | M-160178-00-0005 |
| siGENOME mouse Polr3b siRNA - SMARTPool 5nmol | Dharmacon | M-064863-00-0005 |
| siGENOME mouse Polr1c siRNA - SMART Pool, 5nmol | Dharmacon | M-046056-01-0005 |
| siGENOME Non-Targeting siRNA Control Pools | Dharmcon | D-001206-14-05 |
| Lipofectamine | Invitrogen | 13778150 |
| 96-well plates with Mimitex aligned fibers (PLLA, 2µm fiber diameter, 2-4µm thick) | AMSBIO | AMS-TECL-005-8X |
